# Supplementary material
Source: publisher figshare collection journal article supplement (https://microbiology.figshare.com/articles/dataset/_/26937931)
Supplement: Supplementary file 1 [file 3]

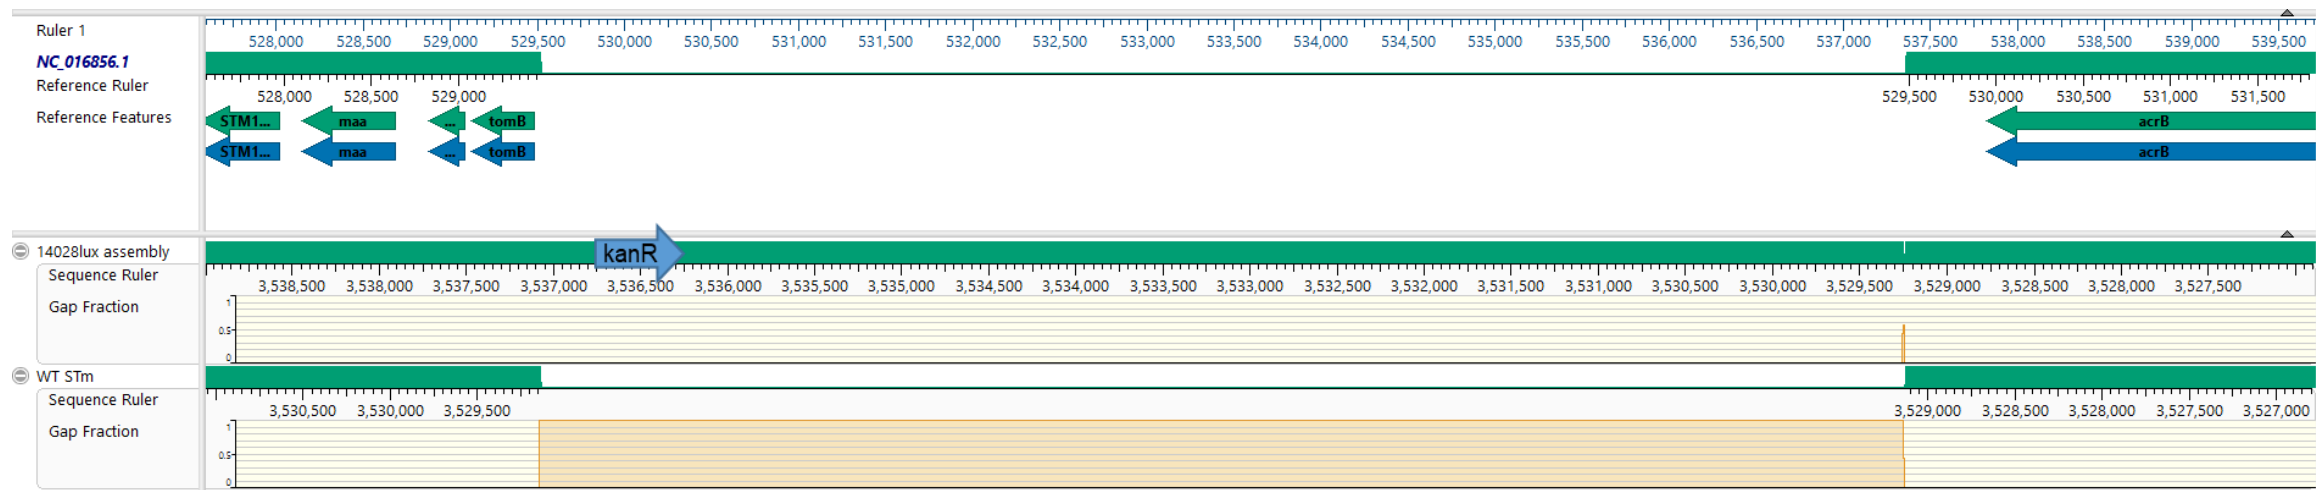

**Supplemental Figure 1. Location of *lux* operon in 14028lux construct.** Following transduction of Xen 33 *lux* operon into WT *S. Typhimurium*, the resulting isolate 14028lux, was sequenced and compared to the WT isolate in order to determine the location of the *lux* operon. Using NC\_016856.1 as reference, WT and 14028lux were aligned and a 7.8kb insertion was found (gap fraction highlighted in orange). Alignment performed with MegAlign Pro. A kanamycin resistance gene (*kanR*) was predicted to be present on the 3' end of the insertion in 14028lux. Annotation of the genome was performed with SeqBuilderPro.
